# Supplementary material for: Identifying and Characterizing the Circular RNAs during the Lifespan of Arabidopsis Leaves
Source: Front Plant Sci. 2017 Jul 20;8:1278. doi: 10.3389/fpls.2017.01278 (PMC5517402; doi:10.3389/fpls.2017.01278)
Supplement: Supplementary file 1 [file Table_1.XLSX]

## Sheet: Sheet1
Supplementary Table 1 List of circRNAs during the lifespan of Arabidopsis leaves
Circular RNAs	Genomic location	transcript-id	type of circRNA	number of exons	circRNA-length	gene-name	gene-biotype
circ-AT1G64720	chr1(-):24047621-24047963	AT1G64720.1	1	2	261	CP5	protein_coding
circ-AT1G72610	chr1(-):27339411-27339716	AT1G72610.1	2	1	306	GLP1	protein_coding
circ-AT2G14835	chr2(+):6370009-6369536	AT2G14835.1	1	2	367	-	protein_coding
circ-AT3G48470	chr3(+):17954439-17953266	AT3G48470.1	1	3	647	EMB2423	protein_coding
circ-AT4G24020	chr4(+):12481259-12480688	AT4G24020.1	1	1	572	NLP7	protein_coding
circ-AT5G04090	chr5(-):1106879-1107381	AT5G04090.2	1	2	289	-	protein_coding
circ-AT5G24450	chr5(+):8352822-8350547	AT5G24450.1	3	7	811	-	protein_coding
circ-AT5G43822	chr5(+):17621714-17620798	AT5G43822.1	1	5	576	-	protein_coding
circ-AT1G22300	chr1(-):7879089-7880684	AT1G22300.3	3	5	1103	GRF10	protein_coding
circ-AT1G48430	chr1(-):17903957-17904292	AT1G48430.1	1	2	206	-	protein_coding
circ-AT1G57590	chr1(-):21327729-21328375	AT1G57590.1	1	4	384	PAE2	protein_coding
circ-AT2G22540	chr2(+):9582430-9581871	AT2G22540.1	1	4	249	SVP	protein_coding
circ-AT3G51460	chr3(+):19095353-19094437	AT3G51460.1	3	4	332	SAC7	protein_coding
circ-AT3G61420	chr3(-):22727471-22729216	AT3G61420.1	1	8	792	TFB1-3	protein_coding
circ-AT4G07390	chr4(+):4197112-4196362	AT4G07390.1	1	4	230	-	protein_coding
circ-AT4G38550	chr4(+):18027708-18027239	AT4G38550.1	1	2	354	-	protein_coding
circ-AT5G03560	chr5(-):900654-901168	AT5G03560.1	3	2	437	-	protein_coding
circ-AT5G60410	chr5(+):24300283-24297668	AT5G60410.1	1	6	1734	SIZ1	protein_coding
circ-AT1G02080	chr1(+):383130-382803	AT1G02080.1	1	2	228	-	protein_coding
circ-AT1G19860	chr1(-):6891713-6893236	AT1G19860.1	3	3	1129	-	protein_coding
circ-AT1G21580	chr1(-):7558475-7560288	AT1G21580.1	1	8	1028	-	protein_coding
circ-AT1G27100	chr1(-):9407643-9408594	AT1G27100.1	3	2	850	-	protein_coding
circ-AT1G54370	chr1(-):20295245-20296559	AT1G54370.1	1	7	433	NHX5	protein_coding
circ-AT1G65220	chr1(+):24227753-24226846	AT1G65220.1	1	3	669	-	protein_coding
circ-AT1G69310	chr1(-):26056117-26056712	AT1G69310.1	1	2	509	WRKY57	protein_coding
circ-AT2G26590	chr2(-):11311833-11312365	AT2G26590.1	1	3	241	RPN13	protein_coding
circ-AT2G35110	chr2(-):14798952-14799462	AT2G35110.1	1	3	339	NAP1	protein_coding
circ-AT3G09100	chr3(-):2788725-2789568	AT3G09100.2	1	4	513	-	protein_coding
circ-AT3G15353	chr3(-):5180891-5181404	AT3G15353.2	2	3	217	MT3	protein_coding
circ-AT3G51460	chr3(+):19095353-19094426	AT3G51460.1	3	4	343	SAC7	protein_coding
circ-AT4G16280	chr4(-):9207163-9211511	AT4G16280.4	1	17	-	FCA	protein_coding
circ-AT5G24160	chr5(-):8185542-8185935	AT5G24160.1	1	2	293	SQE6	protein_coding
circ-AT5G35200	chr5(-):13463301-13464016	AT5G35200.1	1	4	369	-	protein_coding
circ-AT5G40450	chr5(-):16185356-16185668	AT5G40450.1	1	2	231	-	protein_coding
circ-AT5G57160	chr5(-):23157629-23159628	AT5G57160.1	1	9	969	LIG4	protein_coding
circ-AT5G61410	chr5(-):24684409-24684818	AT5G61410.1	1	3	246	RPE	protein_coding
circ-AT1G06150	chr1(-):1872226-1872888	AT1G06150.1	1	3	268	EMB1444	protein_coding
circ-AT1G20620	chr1(+):7144736-7143107	AT1G20620.1	3	3	425	CAT3	protein_coding
circ-AT1G50030	chr1(-):18524201-18524847	AT1G50030.1	1	3	402	TOR	protein_coding
circ-AT2G31350	chr2(+):13370820-13370094	AT2G31350.1	3	4	440	GLX2-5	protein_coding
circ-AT2G32040	chr2(+):13636332-13635786	AT2G32040.1	1	3	377	-	protein_coding
circ-AT4G16260	chr4(-):9200791-9201274	AT4G16260.1	1	1	484	-	protein_coding
circ-AT4G17370	chr4(+):9707224-9706815	AT4G17370.1	1	2	330	-	protein_coding
circ-AT5G22830	chr5(+):7628793-7628210	AT5G22830.1	1	4	321	MRS2-11	protein_coding
circ-AT5G50310	chr5(+):20477609-20477146	AT5G50310.1	1	3	213	-	protein_coding
circ-AT5G54930	chr5(-):22306027-22306885	AT5G54930.1	1	1	859	-	protein_coding
circ-AT5G60410	chr5(+):24297456-24296902	AT5G60410.1	1	3	233	SIZ1	protein_coding
circ-AT1G29965	chr1(-):10498644-10499244	AT1G29965.1	3	3	336	RPL18AA	protein_coding
circ-AT1G31660	chr1(-):11332779-11333248	AT1G31660.1	1	2	349	-	protein_coding
circ-AT5G18590	chr5(-):6180209-6180926	AT5G18590.1	1	4	444	-	protein_coding
circ-AT2G14050	chr2(+):5913797-5912593	AT2G14050.1	3	5	501	MCM9	protein_coding
circ-AT4G39800	chr4(-):18469674-18470071	AT4G39800.1	2	2	312	IPS1	protein_coding
circ-AT3G45770	chr3(-):16805926-16806440	AT3G45770.1	2	3	275	-	protein_coding
circ-AT3G52840	chr3(+):19585902-19585213	AT3G52840.1	1	2	317	BGAL2	protein_coding
circ-AT5G39830	chr5(+):15944478-15943722	AT5G39830.1	1	5	395	DEGP8	protein_coding
circ-AT5G51050	chr5(+):20755645-20754365	AT5G51050.1	3	4	989	-	protein_coding
circ-AT1G20620	chr1(+):7146227-7145924	AT1G20620.2	2	2	212	CAT3	protein_coding
circ-AT1G27100	chr1(-):9407668-9408594	AT1G27100.1	3	2	825	-	protein_coding
circ-AT1G75100	chr1(-):28191514-28191900	AT1G75100.1	1	3	194	JAC1	protein_coding
circ-AT2G22540	chr2(+):9582430-9581506	AT2G22540.1	1	5	328	SVP	protein_coding
circ-AT2G39810	chr2(+):16615133-16613843	AT2G39810.1	1	3	713	HOS1	protein_coding
circ-AT2G41440	chr2(+):17272938-17272368	AT2G41440.1	1	3	213	-	protein_coding
circ-AT2G47470	chr2(+):19482301-19481863	AT2G47470.1	1	3	239	PDIL2-1	protein_coding
circ-AT3G02510	chr3(-):523386-524409	AT3G02510.1	1	4	433	-	protein_coding
circ-AT3G43670	chr3(+):15569288-15568836	AT3G43670.1	1	1	453	-	protein_coding
circ-AT3G61420	chr3(-):22728135-22729216	AT3G61420.1	1	5	597	TFB1-3	protein_coding
circ-AT4G08300	chr4(+):5246756-5246283	AT4G08300.1	1	2	367	-	protein_coding
circ-AT4G27300	chr4(-):13669527-13670730	AT4G27300.1	2	5	710	SD11	protein_coding
circ-AT4G38760	chr4(-):18095427-18095960	AT4G38760.1	1	2	282	-	protein_coding
circ-AT5G23630	chr5(-):7962537-7963227	AT5G23630.1	1	3	290	PDR2	protein_coding
circ-AT1G12270	chr1(+):4174270-4173550	AT1G12270.1	1	4	437	HOP1	protein_coding
circ-AT1G44790	chr1(-):16912610-16913095	AT1G44790.1	1	4	250	-	protein_coding
circ-AT1G47128	chr1(-):17284119-17284593	AT1G47128.1	1	2	377	RD21A	protein_coding
circ-AT1G79000	chr1(-):29719717-29720395	AT1G79000.1	1	2	576	HAC1	protein_coding
circ-AT2G01600	chr2(+):270061-269324	AT2G01600.1	1	4	458	-	protein_coding
circ-AT2G14835	chr2(+):6370009-6369235	AT2G14835.1	1	3	439	-	protein_coding
circ-AT2G20920	chr2(+):8999546-8999195	AT2G20920.1	1	1	352	-	protein_coding
circ-AT2G38020	chr2(-):15910564-15910878	AT2G38020.1	1	2	233	VCL1	protein_coding
circ-AT2G38410	chr2(-):16089235-16089706	AT2G38410.1	1	3	292	-	protein_coding
circ-AT2G39810	chr2(+):16615133-16614068	AT2G39810.1	1	2	578	HOS1	protein_coding
circ-AT3G17000	chr3(+):5798512-5797895	AT3G17000.1	1	3	381	UBC32	protein_coding
circ-AT3G22740	chr3(-):8034058-8034723	AT3G22740.1	1	3	414	HMT3	protein_coding
circ-AT3G24170	chr3(-):8729952-8731050	AT3G24170.1	1	4	333	ATGR1	protein_coding
circ-AT3G56310	chr3(+):20885076-20884459	AT3G56310.1	1	4	298	AGAL3	protein_coding
circ-AT4G24800	chr4(+):12782918-12782449	AT4G24800.1	1	2	314	-	protein_coding
circ-AT4G27640	chr4(-):13798788-13800094	AT4G27640.1	1	7	711	-	protein_coding
circ-AT4G38060	chr4(-):17873705-17874425	AT4G38060.2	3	2	461	-	protein_coding
circ-AT5G17440	chr5(+):5750776-5750270	AT5G17440.1	1	3	286	-	protein_coding
circ-AT5G57350	chr5(-):23231371-23232065	AT5G57350.1	1	3	539	AHA3	protein_coding
circ-AT5G60410	chr5(+):24296299-24295818	AT5G60410.1	1	3	279	SIZ1	protein_coding
circ-AT5G60410	chr5(+):24298832-24297871	AT5G60410.1	1	3	375	SIZ1	protein_coding
circ-AT2G02570	chr2(-):699062-699656	AT2G02570.1	1	3	285	-	protein_coding
circ-AT1G08520	chr1(+):2698722-2697015	AT1G08520.1	1	6	894	CHLD	protein_coding
circ-AT4G04720	chr4(-):2396097-2396474	AT4G04720.1	1	2	297	CPK21	protein_coding
circ-AT4G25500	chr4(+):13027129-13026572	AT4G25500.1	1	1	558	RS40	protein_coding
circ-AT5G64840	chr5(-):25917841-25918253	AT5G64840.1	1	2	321	ABCF5	protein_coding
circ-AT5G04430	chr5(-):1252196-1252766	AT5G04430.1	2	2	146	BTR1	protein_coding
circ-AT1G09340	chr1(+):3017266-3016035	AT1G09340.1	1	6	651	CSP41B	protein_coding
circ-AT2G20340	chr2(+):8780691-8779879	AT2G20340.1	1	3	437	ELI5	protein_coding
circ-AT2G27210	chr2(+):11635368-11635010	AT2G27210.1	1	2	276	BSL3	protein_coding
circ-AT2G34460	chr2(+):14530489-14530097	AT2G34460.1	1	1	393	-	protein_coding
circ-AT3G10060	chr3(+):3103571-3103015	AT3G10060.1	1	4	301	FKBP16-4	protein_coding
circ-AT3G52200	chr3(+):19364575-19363755	AT3G52200.1	1	4	580	LTA3	protein_coding
circ-AT1G64720	chr1(-):24047381-24047963	AT1G64720.1	1	3	343	CP5	protein_coding
circ-AT2G30980	chr2(-):13182778-13183082	AT2G30980.1	1	2	180	ASK6	protein_coding
circ-AT2G32700	chr2(+):13868171-13867526	AT2G32700.1	1	3	470	LUH	protein_coding
circ-AT5G39170	chr2(+):13868386-13867526	AT5G39170.1	1	4	582	-	protein_coding
circ-AT5G19370	chr5(-):6525092-6525754	AT5G19370.1	1	3	298	-	protein_coding
circ-AT5G19730	chr5(+):6672618-6671815	AT5G19730.1	1	3	633	PME53	protein_coding
circ-AT5G27970	chr5(+):10009524-10008822	AT5G27970.1	1	4	307	-	protein_coding
circ-AT1G08830	chr1(+):2828581-2828106	AT1G08830.1	1	3	204	CSD1	protein_coding
circ-AT2G03530	chr2(+):1072845-1072474	AT2G03530.1	1	2	293	UPS2	protein_coding
circ-AT4G24450	chr4(+):12637376-12635480	AT4G24450.1	3	9	1080	GWD2	protein_coding
circ-AT5G37850	chr5(+):15067645-15065605	AT5G37850.3	1	5	435	PK	protein_coding
circ-AT5G49630	chr5(-):20143750-20144197	AT5G49630.1	1	2	361	AAP6	protein_coding
circ-AT1G19860	chr1(-):6892616-6893236	AT1G19860.1	1	2	323	-	protein_coding
circ-AT1G27760	chr1(+):9670619-9670307	AT1G27760.1	1	1	313	SAT32	protein_coding
circ-AT1G31480	chr1(+):11270042-11269590	AT1G31480.1	1	3	256	SGR2	protein_coding
circ-AT1G49970	chr1(-):18502110-18503132	AT1G49970.1	1	5	525	CLPR1	protein_coding
circ-AT1G52150	chr1(-):19410583-19410908	AT1G52150.1	1	1	326	ATHB-15	protein_coding
circ-AT1G56200	chr1(+):21031432-21031092	AT1G56200.1	1	2	213	emb1303	protein_coding
circ-AT1G65430	chr1(-):24301628-24303784	AT1G65430.1	1	6	528	ARI8	protein_coding
circ-AT1G73805	chr1(-):27747515-27748052	AT1G73805.1	1	1	538	SARD1	protein_coding
circ-AT1G79610	chr1(-):29955203-29956360	AT1G79610.1	1	7	430	NHX6	protein_coding
circ-AT2G43410	chr2(-):18026359-18029348	AT2G43410.2	1	4	2474	FPA	protein_coding
circ-AT3G13460	chr3(-):4387215-4387911	AT3G13460.1	3	4	430	ECT2	protein_coding
circ-AT4G11910	chr4(+):7157258-7156830	AT4G11910.1	1	2	342	SGR2	protein_coding
circ-AT5G27350	chr5(+):9651089-9650451	AT5G27350.1	1	4	282	SFP1	protein_coding
circ-AT1G63900	chr1(+):23718728-23718251	AT1G63900.1	1	3	268	DAL1	protein_coding
circ-AT2G42600	chr2(-):17736698-17737537	AT2G42600.1	1	4	567	PPC2	protein_coding
circ-AT2G42600	chr2(-):17736698-17737234	AT2G42600.1	1	3	344	PPC2	protein_coding
circ-AT3G48110	chr3(+):17765278-17763948	AT3G48110.1	1	7	626	GLYRS-2	protein_coding
circ-AT3G10060	chr3(+):3103571-3103168	AT3G10060.1	1	3	243	FKBP16-4	protein_coding
circ-AT4G28600	chr4(+):14131936-14130385	AT4G28600.1	1	2	1473	NPGR2	protein_coding
circ-AT1G70740	chr1(-):26674698-26675242	AT1G70740.2	1	2	446	-	protein_coding
circ-AT2G14260	chr2(-):6042808-6043534	AT2G14260.1	1	4	470	PIP	protein_coding
circ-AT3G13040	chr3(-):4173866-4174517	AT3G13040.1	1	1	652	-	protein_coding
circ-AT3G33530	chr3(+):14091790-14090909	AT3G33530.1	1	3	598	-	protein_coding
circ-AT3G43300	chr3(-):15235834-15236310	AT3G43300.1	1	2	409	ATMIN7	protein_coding
circ-AT4G10770	chr4(-):6632014-6632412	AT4G10770.1	1	1	399	OPT7	protein_coding
circ-AT5G06610	chr5(+):2031768-2031427	AT5G06610.1	1	1	342	-	protein_coding
circ-AT5G50920	chr5(-):20719227-20719806	AT5G50920.1	1	1	580	CLPC1	protein_coding
circ-AT5G64240	chr5(+):25696661-25696331	AT5G64240.1	1	1	331	AMC3	protein_coding
circ-AT3G47470	chr3(-):17494306-17494847	AT3G47470.1	2	2	315	LHCA4	protein_coding
circ-AT1G30400	chr1(+):10732286-10730993	AT1G30400.1	1	5	519	ABCC1	protein_coding
circ-AT1G76510	chr1(-):28711690-28712510	AT1G76510.1	1	3	582	ARID5	protein_coding
circ-AT4G00060	chr4(+):26752-25294	AT4G00060.1	1	5	687	MEE44	protein_coding
circ-AT5G61270	chr5(-):24639691-24640293	AT5G61270.1	1	2	526	BHLH72	protein_coding
circ-AT1G03860	chr1(-):980778-981160	AT1G03860.2	1	1	174	PHB2	protein_coding
circ-AT2G22540	chr2(+):9583193-9581871	AT2G22540.1	1	6	443	SVP	protein_coding
circ-AT3G24170	chr3(-):8733642-8734142	AT3G24170.1	1	3	312	ATGR1	protein_coding
circ-AT4G29060	chr4(+):14320536-14320130	AT4G29060.1	1	1	407	emb2726	protein_coding
circ-AT1G44170	chr1(-):16797274-16797830	AT1G44170.1	1	3	394	ALDH3H1	protein_coding
circ-AT1G65270	chr1(+):24244536-24243943	AT1G65270.1	1	3	311	-	protein_coding
circ-AT3G14420	chr3(+):4822309-4821788	AT3G14420.1	1	3	325	GLO1	protein_coding
circ-AT5G03650	chr5(+):936321-935687	AT5G03650.1	1	3	378	SBE2.2	protein_coding
circ-AT5G19550	chr5(+):6599463-6598597	AT5G19550.1	1	5	439	ASP2	protein_coding
circ-AT1G74040	chr1(+):27844581-27843103	AT1G74040.1	1	7	685	IPMS2	protein_coding
-	chr1(-):14160516-14160909	-	4	-	394	-	-
-	chr3(-):22265001-22265345	-	4	-	345	-	-
-	chr1(-):6461318-6462092	-	4	-	775	-	-
-	chr5(+):14933910-14933589	-	4	-	322	-	-
-	chr2(-):8857154-8857575	-	4	-	422	-	-
-	chr3(-):6511160-6511758	-	4	-	599	-	-
-	Pt(-):55152-55525	-	4	-	374	-	-
-	Pt(-):55043-56238	-	4	-	1196	-	-
-	Pt(-):73313-73618	-	4	-	306	-	-
-	chr1(-):14160287-14160909	-	4	-	623	-	-
Genomic location	type of circRNA	transcript-id	number of exons	circRNA-length
chr5(-):1106879-1107381	1	AT5G04090.2	2	289
chr5(-):1106879-1107381	1	AT5G04090.1	1	503
chr1(-):7879089-7880684	3	AT1G22300.3	5	1103
chr1(-):7879089-7880684	3	AT1G22300.1	6	755
chr5(+):15067645-15065605	1	AT5G37850.3	5	435
chr5(+):15067645-15065605	1	AT5G37850.1	6	519
chr2(-):18026359-18029348	1	AT2G43410.2	4	2474
chr2(-):18026359-18029348	1	AT2G43410.1	5	2345
chr1(-):980778-981160	1	AT1G03860.2	1	174
chr1(-):980778-981160	1	AT1G03860.1	2	291
chr3(+):4822309-4821788	1	AT3G14420.1	3	325
chr3(+):4822309-4821788	1	AT3G14420.6	2	417
chr3(+):4822309-4821798	1	AT3G14420.5	3	329
		type of circRNA
注：type of circRNA	1	splice site located right in both ends of exons
	2	both splice site located in internal site of exons
	3	one site located in end of exon ,the other site located in internal site of exon
	4	intergenic
