# Supplementary material for: Identifying and Characterizing the Circular RNAs during the Lifespan of Arabidopsis Leaves
Source: Front Plant Sci. 2017 Jul 20;8:1278. doi: 10.3389/fpls.2017.01278 (PMC5517402; doi:10.3389/fpls.2017.01278)
Supplement: Supplementary file 2 [file Table_2.XLSX]

## Sheet: table2
Supplimentary Table 2 Expression profiles of candidate circRNAs
ID	Gene	4D	6D	8D	10D	12D	14D	16D	18D	20D	22D	24D	26D	28D	30D
1~1|27339411|27339716|--	GLP1AT1G72600|GLP1AT1G72600	0.0240952	0.0583009	0.020296	0.100884	0.0192751	0.0192381	0.0192118	0.0216007	0.0211302	0.0233559	0.0197476	0.0201342	0.0200488	0.0226042
2~2|6370009|6369536|++	AT2G14835|AT2G14835	0.0240952	0.0188059	0.020296	0.0505493	0.0192751	0.0664452	0.0192118	0.0216007	0.0516146	0.0233559	0.0898296	0.0201342	0.0200488	0.0226042
3~3|17954439|17953266|++	EMB2423|EMB2423	0.0240952	0.0188059	0.020296	0.0606698	0.0192751	0.0570038	0.0192118	0.0216007	0.0759737	0.0575475	0.100669	0.0615388	0.207693	0.147073
4~4|12481259|12480688|++	NLP7|NLP7	0.0240952	0.0583009	0.0797584	0.0505493	0.124722	0.058425	0.134483	0.131605	0.167427	0.199929	0.125463	0.240474	0.220537	0.452375
5~5|1106879|1107381|--	AT5G04090|AT5G04090	0.194453	0.292904	0.220405	0.393361	0.483032	0.574302	0.647518	0.578216	0.612443	1.00357	1.02806	1.0348	1.6167	2.3875
5~5|8352822|8350547|++	AT5G24450|AT5G24450	0.0240952	0.0188059	0.020296	0.0707904	0.0192751	0.0192381	0.0192118	0.0216007	0.0617761	0.0233559	0.0197476	0.0201342	0.0617573	0.135044
5~5|17621714|17620798|++	AT5G43822|AT5G43822	0.0240952	0.0188059	0.0500272	0.0505493	0.0192751	0.0475624	0.0192118	0.0216007	0.0845208	0.0233559	0.0522652	0.07189	0.0970223	0.0226042
1~1|7879089|7880684|--	GRF10|GRF10	0.0240952	0.0188059	0.020296	0.0201875	0.0192751	0.0192381	0.0192118	0.0216007	0.0617761	0.059232	0.0642894	0.0201342	0.109866	0.0783887
1~1|17903957|17904292|--	AT1G48430|AT1G48430	0.0240952	0.0188059	0.020296	0.0201875	0.0192751	0.0570038	0.0192118	0.0216007	0.0540363	0.0831493	0.0642894	0.0201342	0.0585355	0.0569462
2~2|9582430|9581871|++	SVP|SVP	0.0240952	0.0188059	0.020296	0.0201875	0.0192751	0.123094	0.0192118	0.0216007	0.102422	0.154901	0.0197476	0.175402	0.0585355	0.114183
3~3|19095353|19094437|++	SAC7|SAC7	0.0240952	0.0188059	0.020296	0.0503883	0.0192751	0.0853281	0.0620547	0.0216007	0.0617761	0.107067	0.125463	0.170856	0.21011	0.305012
3~3|22727471|22729216|--	TFB1-3|TFB1-3	0.0240952	0.0188059	0.020296	0.0201875	0.0192751	0.0475624	0.0192118	0.0216007	0.0540363	0.0831493	0.0910145	0.154699	0.190866	0.328487
4~4|4197112|4196362|++	AT4G07390|AT4G07390	0.0240952	0.0583009	0.020296	0.0201875	0.0464913	0.0682217	0.0192118	0.0216007	0.102422	0.187409	0.125463	0.196104	0.279072	0.508159
4~4|18027708|18027239|++	AT4G38550|AT4G38550	0.0240952	0.0188059	0.020296	0.0201875	0.0555633	0.0192381	0.0192118	0.109004	0.0719376	0.059232	0.0642894	0.121941	0.10906	0.0226042
5~5|900654|901168|--	AT5G03560|AT5G03560	0.0240952	0.0188059	0.020296	0.0201875	0.0827795	0.0192381	0.0620547	0.0668029	0.0211302	0.0831493	0.0197476	0.108181	0.0489139	0.0895456
5~5|24300283|24297668|++	SIZ1|SIZ1	0.0240952	0.0188059	0.020296	0.0201875	0.0646354	0.0570038	0.0192118	0.0216007	0.0211302	0.0711906	0.0197476	0.0903196	0.0777789	0.180834
1~1|6891713|6893236|--	AT1G19860|AT1G19860	0.0240952	0.0188059	0.0618384	0.0201875	0.0192751	0.0192381	0.0192118	0.0216007	0.0979112	0.0233559	0.164958	0.0925923	0.318365	0.564234
1~1|7558475|7560288|--	AT1G21580|AT1G21580	0.0634087	0.0780484	0.020296	0.0201875	0.0192751	0.104211	0.0854159	0.176807	0.104844	0.114534	0.287305	0.20942	0.317559	0.415709
1~1|9407643|9408594|--	AT1G27100|AT1G27100	0.0240952	0.0188059	0.020296	0.0201875	0.0192751	0.0192381	0.0192118	0.0216007	0.0211302	0.0233559	0.0197476	0.0201342	0.0617573	0.0560749
1~1|26056117|26056712|--	WRKY57|WRKY57	0.0240952	0.0188059	0.020296	0.0201875	0.0192751	0.0192381	0.0192118	0.0216007	0.0516146	0.0233559	0.0197476	0.0201342	0.0617573	0.169677
2~2|11311833|11312365|--	RPN13|RPN13	0.0240952	0.0188059	0.020296	0.0201875	0.0192751	0.0192381	0.0192118	0.0216007	0.0211302	0.0233559	0.0197476	0.0201342	0.0513302	0.0569462
2~2|14798952|14799462|--	NAP1|NAP1	0.0240952	0.0188059	0.020296	0.0201875	0.0192751	0.0192381	0.0192118	0.0216007	0.0211302	0.0233559	0.0197476	0.0201342	0.0513302	0.0560749
3~3|19095353|19094426|++	SAC7|SAC7	0.0240952	0.0188059	0.020296	0.0201875	0.0192751	0.0192381	0.0192118	0.0216007	0.0211302	0.0233559	0.0197476	0.0201342	0.0801952	0.102735
4~4|9207163|9211511|--	FCA|FCA	0.0240952	0.0188059	0.020296	0.0201875	0.0192751	0.0192381	0.0192118	0.0216007	0.0211302	0.0233559	0.0197476	0.0201342	0.0801952	0.0226042
5~5|8185542|8185935|--	SQE6|SQE6	0.0240952	0.0188059	0.020296	0.0201875	0.0192751	0.0192381	0.0192118	0.0216007	0.0211302	0.0233559	0.0197476	0.0201342	0.0617573	0.123888
5~5|13463301|13464016|--	AT5G35200|AT5G35200	0.0240952	0.0188059	0.020296	0.0201875	0.0192751	0.0192381	0.0192118	0.0216007	0.0820991	0.0233559	0.0197476	0.0201342	0.0513302	0.0226042
5~5|16185356|16185668|--	AT5G40450|AT5G40450	0.0240952	0.0188059	0.020296	0.0201875	0.0192751	0.0192381	0.0192118	0.0216007	0.0211302	0.0233559	0.0464727	0.0201342	0.157169	0.0226042
5~5|23157629|23159628|--	LIG4|LIG4	0.0240952	0.0188059	0.020296	0.0201875	0.0192751	0.0192381	0.0192118	0.0216007	0.0211302	0.0233559	0.0522652	0.0903196	0.0617573	0.0226042
2~2|13370820|13370094|++	GLX2-5|GLX2-5	0.0240952	0.0188059	0.020296	0.0201875	0.0192751	0.0192381	0.0192118	0.0216007	0.0211302	0.0233559	0.0464727	0.0201342	0.0874006	0.0895456
4~4|9200791|9201274|--	AT4G16260|AT4G16260	0.0240952	0.0188059	0.020296	0.0201875	0.0192751	0.0192381	0.0192118	0.0216007	0.0211302	0.0233559	0.0642894	0.0822411	0.0200488	0.0226042
5~5|22306027|22306885|--	AT5G54930|AT5G54930	0.0240952	0.0188059	0.020296	0.0201875	0.0192751	0.0192381	0.0192118	0.0781035	0.0211302	0.0233559	0.0464727	0.102943	0.0200488	0.0226042
5~5|24297456|24296902|++	SIZ1|SIZ1	0.0240952	0.0188059	0.020296	0.0201875	0.0192751	0.0192381	0.0192118	0.0216007	0.0211302	0.0233559	0.0464727	0.0201342	0.0200488	0.0895456
1~1|10498644|10499244|--	RPL18AA|RPL18AA	0.115827	0.0634668	0.020296	0.0201875	0.0192751	0.0192381	0.0192118	0.0216007	0.0211302	0.0233559	0.0197476	0.0201342	0.0200488	0.0226042
5~5|6180209|6180926|--	AT5G18590|AT5G18590	0.0240952	0.0813312	0.0599376	0.0201875	0.0737075	0.0664452	0.11969	0.0668029	0.0820991	0.0233559	0.0197476	0.0201342	0.0200488	0.0226042
2~2|5913797|5912593|++	MCM9|MCM9	0.0240952	0.0188059	0.020296	0.0201875	0.0192751	0.0192381	0.0192118	0.0216007	0.0211302	0.0575475	0.0197476	0.0201342	0.0200488	0.0560749
5~5|20755645|20754365|++	AT5G51050|AT5G51050	0.0240952	0.0188059	0.020296	0.0201875	0.0192751	0.0192381	0.0511416	0.0216007	0.0211302	0.0233559	0.0197476	0.0201342	0.116266	0.0226042
1~1|6461318|6462092|--	PNSB4|PNSB4	0.0240952	0.0188059	0.020296	0.0201875	0.0192751	0.0192381	0.0192118	0.0216007	0.065005	0.0233559	0.0197476	0.07189	0.0200488	0.0560749
1~1|9407668|9408594|--	AT1G27100|AT1G27100	0.0240952	0.0188059	0.020296	0.0201875	0.0192751	0.0192381	0.0192118	0.0216007	0.0617761	0.0233559	0.0197476	0.0615388	0.0777789	0.146782
2~2|9582430|9581506|++	SVP|SVP	0.0240952	0.0188059	0.020296	0.0201875	0.0192751	0.0192381	0.0192118	0.0216007	0.0211302	0.0233559	0.0197476	0.0805366	0.0200488	0.0226042
2~2|17272938|17272368|++	AT2G41440|AT2G41440	0.0240952	0.0188059	0.0500272	0.0201875	0.0192751	0.0192381	0.0192118	0.052501	0.0211302	0.0233559	0.0197476	0.0511876	0.0681572	0.0560749
3~3|523386|524409|--	AT3G02510|AT3G02510	0.0634087	0.0188059	0.020296	0.0201875	0.0192751	0.0192381	0.0192118	0.0216007	0.0211302	0.0233559	0.0197476	0.07189	0.0489139	0.0226042
4~4|5246756|5246283|++	AT4G08300|AT4G08300	0.0240952	0.0188059	0.020296	0.0201875	0.0192751	0.0192381	0.0192118	0.0216007	0.0211302	0.0233559	0.0197476	0.101239	0.145131	0.260094
4~4|13669527|13670730|--	SD11|SD11	0.0240952	0.0188059	0.020296	0.0201875	0.0192751	0.0192381	0.0192118	0.0216007	0.0211302	0.0233559	0.0197476	0.0805366	0.0489139	0.0226042
5~5|7962537|7963227|--	PDR2|PDR2	0.0240952	0.0188059	0.020296	0.0201875	0.0192751	0.0192381	0.0192118	0.0216007	0.0211302	0.0233559	0.0197476	0.07189	0.0200488	0.0560749
1~1|4174270|4173550|++	HOP1|HOP1	0.0240952	0.0188059	0.020296	0.0201875	0.0192751	0.0192381	0.0192118	0.0216007	0.0211302	0.0233559	0.0197476	0.0201342	0.0200488	0.101574
1~1|17284119|17284593|--	RD21A|RD21A	0.0240952	0.0188059	0.020296	0.0201875	0.0192751	0.0192381	0.0192118	0.052501	0.0211302	0.0233559	0.0197476	0.0201342	0.0200488	0.0560749
2~2|8999546|8999195|++	AT2G20920|AT2G20920	0.0240952	0.0188059	0.020296	0.0201875	0.0192751	0.0192381	0.0192118	0.0216007	0.0211302	0.0233559	0.0197476	0.0494831	0.0200488	0.0672318
2~2|15910564|15910878|--	VCL1|VCL1	0.0240952	0.0188059	0.020296	0.0201875	0.0192751	0.0192381	0.0192118	0.0216007	0.0211302	0.0233559	0.0197476	0.0201342	0.0200488	0.124178
2~2|16089235|16089706|--	AT2G38410|AT2G38410	0.0240952	0.0188059	0.020296	0.0201875	0.0192751	0.0192381	0.0192118	0.0216007	0.0211302	0.0233559	0.0197476	0.0494831	0.0200488	0.0783887
2~2|16615133|16614068|++	HOS1|HOS1	0.0240952	0.0484272	0.020296	0.0201875	0.0192751	0.0192381	0.0192118	0.0216007	0.0211302	0.0233559	0.0197476	0.0201342	0.0585355	0.0672318
4~4|13798788|13800094|--	AT4G27640|AT4G27640	0.0240952	0.0188059	0.020296	0.0201875	0.0192751	0.0192381	0.0192118	0.0555023	0.0540363	0.0233559	0.0197476	0.0494831	0.0200488	0.0672318
4~4|17873705|17874425|--	AT4G38060|AT4G38060	0.0240952	0.0188059	0.020296	0.0201875	0.0192751	0.0192381	0.0192118	0.0216007	0.0211302	0.0233559	0.0197476	0.0201342	0.0200488	0.235747
5~5|24298832|24297871|++	SIZ1|SIZ1	0.0240952	0.0188059	0.020296	0.0201875	0.0192751	0.0192381	0.0192118	0.052501	0.0211302	0.0233559	0.0197476	0.0201342	0.0200488	0.0560749
2~2|699062|699656|--	AT2G02570|AT2G02570	0.0240952	0.0188059	0.020296	0.0201875	0.060087	0.0486283	0.0192118	0.0555023	0.0211302	0.0233559	0.0197476	0.0201342	0.0200488	0.0226042
4~4|13027129|13026572|++	RS40|RS40	0.0240952	0.0188059	0.020296	0.0201875	0.0192751	0.0486283	0.0192118	0.089404	0.0516146	0.0233559	0.0631045	0.0201342	0.0200488	0.0226042
5~5|1252196|1252766|--	BTR1|BTR1	0.0765132	0.0484272	0.020296	0.0201875	0.0192751	0.0192381	0.0192118	0.0216007	0.0211302	0.0233559	0.0197476	0.0201342	0.0200488	0.0226042
2~2|14530489|14530097|++	AT2G34460|AT2G34460	0.0240952	0.0188059	0.0514528	0.0201875	0.0192751	0.0192381	0.0192118	0.0216007	0.0211302	0.0233559	0.0631045	0.0201342	0.0200488	0.0226042
3~3|3103571|3103015|++	FKBP16-4|FKBP16-4	0.0240952	0.0188059	0.0514528	0.0503883	0.0192751	0.0192381	0.0706233	0.0216007	0.0211302	0.0233559	0.0197476	0.0201342	0.0200488	0.0226042
2~2|13868386|13867526|++	LUH|LUH	0.0240952	0.0188059	0.020296	0.0201875	0.0192751	0.0475624	0.0449176	0.0731012	0.0211302	0.0233559	0.0197476	0.0201342	0.0681572	0.0226042
5~5|6672618|6671815|++	PME53|PME53	0.0240952	0.0188059	0.020296	0.0201875	0.0192751	0.0192381	0.0620547	0.0555023	0.0211302	0.0233559	0.0197476	0.0201342	0.0200488	0.0226042
5~5|20143750|20144197|--	AAP6|AAP6	0.0240952	0.0188059	0.020296	0.0201875	0.0192751	0.0192381	0.0192118	0.0216007	0.0211302	0.0233559	0.0522652	0.0201342	0.0200488	0.0683935
3~3|4387215|4387911|--	ECT2|ECT2	0.0240952	0.0188059	0.020296	0.0201875	0.0192751	0.0192381	0.0192118	0.0216007	0.0211302	0.0233559	0.0197476	0.0201342	0.0489139	0.0569462
4~4|6632014|6632412|--	OPT7|OPT7	0.0240952	0.0188059	0.020296	0.0201875	0.0464913	0.0192381	0.0192118	0.0216007	0.0211302	0.0233559	0.0197476	0.0494831	0.0489139	0.0226042
5~5|20719227|20719806|--	CLPC1|CLPC1	0.0240952	0.0188059	0.020296	0.0201875	0.0192751	0.0192381	0.0192118	0.0216007	0.0211302	0.0233559	0.0197476	0.0494831	0.0681572	0.0226042
