# Supplementary material for: Identifying and Characterizing the Circular RNAs during the Lifespan of Arabidopsis Leaves
Source: Front Plant Sci. 2017 Jul 20;8:1278. doi: 10.3389/fpls.2017.01278 (PMC5517402; doi:10.3389/fpls.2017.01278)
Supplement: Supplementary file 3 [file Table_3.XLSX]

## Sheet: Sheet1
Supplemnetary Table 3 List of differentially expressed circRNAs
The differentially expressed circRNAs at G-to-M stage
circRNAs	gene.name	Regulation
1~1|27339411|27339716|--	GLP1AT1G72600|GLP1AT1G72600	up
4~4|12481259|12480688|++	NLP7|NLP7	up
2~2|9582430|9581871|++	SVP|SVP	up
4~4|18027708|18027239|++	AT4G38550|AT4G38550	up
1~1|10498644|10499244|--	RPL18AA|RPL18AA	down
5~5|6180209|6180926|--	AT5G18590|AT5G18590	up
The differentially expressed circRNAs at M-to-S stage
circRNAs	gene.name	Regulation
2~2|6370009|6369536|++	AT2G14835|AT2G14835	up
3~3|17954439|17953266|++	EMB2423|EMB2423	up
5~5|8352822|8350547|++	AT5G24450|AT5G24450	up
5~5|17621714|17620798|++	AT5G43822|AT5G43822	up
1~1|7879089|7880684|--	GRF10|GRF10	up
1~1|17903957|17904292|--	AT1G48430|AT1G48430	up
2~2|9582430|9581871|++	SVP|SVP	up
3~3|19095353|19094437|++	SAC7|SAC7	up
3~3|22727471|22729216|--	TFB1-3|TFB1-3	up
4~4|4197112|4196362|++	AT4G07390|AT4G07390	up
4~4|18027708|18027239|++	AT4G38550|AT4G38550	up
5~5|24300283|24297668|++	SIZ1|SIZ1	up
1~1|6891713|6893236|--	AT1G19860|AT1G19860	up
1~1|7558475|7560288|--	AT1G21580|AT1G21580	up
1~1|26056117|26056712|--	WRKY57|WRKY57	up
3~3|19095353|19094426|++	SAC7|SAC7	up
4~4|9207163|9211511|--	FCA|FCA	up
5~5|8185542|8185935|--	SQE6|SQE6	up
5~5|13463301|13464016|--	AT5G35200|AT5G35200	up
5~5|16185356|16185668|--	AT5G40450|AT5G40450	up
5~5|23157629|23159628|--	LIG4|LIG4	up
2~2|13370820|13370094|++	GLX2-5|GLX2-5	up
4~4|9200791|9201274|--	AT4G16260|AT4G16260	up
5~5|22306027|22306885|--	AT5G54930|AT5G54930	up
5~5|24297456|24296902|++	SIZ1|SIZ1	up
5~5|6180209|6180926|--	AT5G18590|AT5G18590	down
1~1|9407668|9408594|--	AT1G27100|AT1G27100	up
2~2|9582430|9581506|++	SVP|SVP	up
4~4|5246756|5246283|++	AT4G08300|AT4G08300	up
4~4|13669527|13670730|--	SD11|SD11	up
1~1|4174270|4173550|++	HOP1|HOP1	up
2~2|15910564|15910878|--	VCL1|VCL1	up
2~2|16089235|16089706|--	AT2G38410|AT2G38410	up
4~4|17873705|17874425|--	AT4G38060|AT4G38060	up
4~4|13027129|13026572|++	RS40|RS40	up
