# Supplementary material for: Identifying and Characterizing the Circular RNAs during the Lifespan of Arabidopsis Leaves
Source: Front Plant Sci. 2017 Jul 20;8:1278. doi: 10.3389/fpls.2017.01278 (PMC5517402; doi:10.3389/fpls.2017.01278)
Supplement: Supplementary file 4 [file Table_4.XLSX]

## Sheet: Sheet1
Supplementary Table 4 Primers in the real-time PCR assay for validating
Target name	Primer name	sequence:5'-3'	Amplication size(bp)
4~4|12481259|12480688|++	1-Forward	TGGCCTTGCCTGTCTTTAAT	220
	1-Reverse	GTTGTCTGTGTTCTCTGGTGGG
5~5|1106879|1107381|--	2-Forward	AGCACCAGATAATGGAATATAACG	159
	2-Reverse	GGTTCATGTAAAGCTGGAGGC
4~4|4197112|4196362|++	3-Forward	TGAGAGTTTTCACCAGCTTACAGGA	109
	3-Reverse	ATAAAGAGCTTCGAAAAGCGTC
1~1|6891713|6893236|--	4-Forward	GCCAAGGGATTCAAAACC	238
	4-Reverse	ACCAGGTGGCAGATTATCA
