# Supplementary material for: Identifying and Characterizing the Circular RNAs during the Lifespan of Arabidopsis Leaves
Source: Front Plant Sci. 2017 Jul 20;8:1278. doi: 10.3389/fpls.2017.01278 (PMC5517402; doi:10.3389/fpls.2017.01278)
Supplement: Supplementary file 5 [file Table_5.XLSX]

## Sheet: Sheet1
Supplementary Table 5 List of pairs of circRNAs-miRNA-mRNA
Pairs of circRNAs-miRNA-mRNA at G-to-M stage
CircRNAs	miRNA	mRNA
4~4|12481259|12480688|++	miR401	AT1G31550.2
4~4|12481259|12480688|++	miR401	AT1G31550.1
4~4|12481259|12480688|++	miR401	AT5G56200.1
4~4|18027708|18027239|++	miR5026	AT5G14180.1
4~4|12481259|12480688|++	miR169d	AT1G70700.2
4~4|12481259|12480688|++	miR169d	AT2G22560.1
4~4|12481259|12480688|++	miR169d	AT5G06510.1
4~4|12481259|12480688|++	miR169d	AT3G05690.1
4~4|12481259|12480688|++	miR169d	AT1G54160.1
4~4|12481259|12480688|++	miR169d	AT1G72830.1
4~4|12481259|12480688|++	miR169d	AT3G20910.1
4~4|12481259|12480688|++	miR171a-3p	AT3G50400.1
4~4|12481259|12480688|++	miR164a	AT1G56010.1
4~4|12481259|12480688|++	miR164a	AT1G56010.2
4~4|12481259|12480688|++	miR164a	AT5G02580.2
4~4|12481259|12480688|++	miR164a	AT5G39610.1
4~4|12481259|12480688|++	miR164a	AT5G02580.1
4~4|12481259|12480688|++	miR164a	AT5G07680.1
4~4|12481259|12480688|++	miR164a	AT5G07680.2
4~4|12481259|12480688|++	miR164a	AT5G61430.1
Pairs of circRNAs-miRNA-mRNA at M-to-S stage
CircRNAs	miRNA	mRNA
1~1|7558475|7560288|--	miR158a-3p	AT5G16910.1
1~1|7558475|7560288|--	miR158a-3p	AT5G61010.2
1~1|7879089|7880684|--	miR158a-3p	AT5G16910.1
1~1|7879089|7880684|--	miR158a-3p	AT5G61010.2
1~1|7879089|7880684|--	miR161.2	AT2G38250.1
1~1|7879089|7880684|--	miR161.2	AT4G29380.1
2~2|13370820|13370094|++	miR858a	AT1G06180.1
2~2|13370820|13370094|++	miR858a	AT2G33770.1
2~2|13370820|13370094|++	miR858a	AT4G05100.1
2~2|13370820|13370094|++	miR858a	AT4G34990.1
2~2|13370820|13370094|++	miR164a	AT1G56010.1
2~2|13370820|13370094|++	miR164a	AT1G56010.2
2~2|13370820|13370094|++	miR164a	AT5G02580.2
2~2|13370820|13370094|++	miR164a	AT5G39610.1
2~2|13370820|13370094|++	miR164a	AT5G02580.1
2~2|13370820|13370094|++	miR164a	AT5G07680.1
2~2|13370820|13370094|++	miR164a	AT5G07680.2
2~2|13370820|13370094|++	miR164a	AT5G61430.1
3~3|17954439|17953266|++	miR167b	AT1G51760.1
5~5|23157629|23159628|--	miR401	AT1G31550.2
5~5|23157629|23159628|--	miR401	AT1G31550.1
5~5|23157629|23159628|--	miR401	AT5G56200.1
4~4|18027708|18027239|++	miR5026	AT5G14180.1
5~5|17621714|17620798|++	miR400	AT2G28680.1
5~5|17621714|17620798|++	miR400	AT3G44880.1
5~5|17621714|17620798|++	miR400	AT5G28237.1
3~3|22727471|22729216|--	miR863-3p	AT2G29320.1
3~3|22727471|22729216|--	miR863-3p	AT2G32670.1
3~3|22727471|22729216|--	miR863-3p	AT2G19180.1
3~3|22727471|22729216|--	miR863-3p	AT1G18880.1
3~3|22727471|22729216|--	miR858b	AT1G06180.1
3~3|22727471|22729216|--	miR858b	AT3G16170.1
3~3|22727471|22729216|--	miR858b	AT4G05100.1
3~3|22727471|22729216|--	miR858b	AT3G27170.1
3~3|22727471|22729216|--	miR858b	AT1G18710.1
3~3|22727471|22729216|--	miR858b	AT4G34990.1
3~3|22727471|22729216|--	miR858b	AT1G48000.1
3~3|22727471|22729216|--	miR858b	AT3G06490.1
5~5|23157629|23159628|--	miR171a-3p	AT3G50400.1
3~3|19095353|19094426|++	miR850	AT3G28007.1
3~3|19095353|19094437|++	miR850	AT3G28007.1
3~3|22727471|22729216|--	miR850	AT3G28007.1
1~1|9407668|9408594|--	miR850	AT3G28007.1
1~1|7879089|7880684|--	miR447a.2-3p	AT1G54710.1
5~5|16185356|16185668|--	miR447a.2-3p	AT1G54710.1
3~3|17954439|17953266|++	miR170-5p	AT3G01270.1
1~1|7879089|7880684|--	miR396a-5p	AT1G48490.3
1~1|7879089|7880684|--	miR396a-5p	AT2G36400.1
1~1|7879089|7880684|--	miR396a-5p	AT5G43060.1
1~1|6891713|6893236|--	miR169h	AT1G72830.1
1~1|6891713|6893236|--	miR169h	AT1G70700.2
1~1|6891713|6893236|--	miR169h	AT3G20910.1
1~1|6891713|6893236|--	miR169h	AT5G06510.1
1~1|6891713|6893236|--	miR169h	AT3G05690.1
1~1|6891713|6893236|--	miR169h	AT1G54160.1
5~5|23157629|23159628|--	miR169h	AT1G72830.1
5~5|23157629|23159628|--	miR169h	AT1G70700.2
5~5|23157629|23159628|--	miR169h	AT3G20910.1
5~5|23157629|23159628|--	miR169h	AT5G06510.1
5~5|23157629|23159628|--	miR169h	AT3G05690.1
5~5|23157629|23159628|--	miR169h	AT1G54160.1
1~1|7879089|7880684|--	miR169h	AT1G72830.1
1~1|7879089|7880684|--	miR169h	AT1G70700.2
1~1|7879089|7880684|--	miR169h	AT3G20910.1
1~1|7879089|7880684|--	miR169h	AT5G06510.1
1~1|7879089|7880684|--	miR169h	AT3G05690.1
1~1|7879089|7880684|--	miR169h	AT1G54160.1
1~1|7558475|7560288|--	miR158b	AT5G16910.1
2~2|13370820|13370094|++	miR838	AT1G19180.2
2~2|13370820|13370094|++	miR838	AT1G79320.1
2~2|13370820|13370094|++	miR838	AT5G04180.1
2~2|13370820|13370094|++	miR838	AT5G54040.1
2~2|13370820|13370094|++	miR838	AT5G49600.1
2~2|13370820|13370094|++	miR838	AT5G45340.2
2~2|13370820|13370094|++	miR838	AT2G45720.1
2~2|13370820|13370094|++	miR838	AT5G65300.1
2~2|13370820|13370094|++	miR838	AT5G04250.2
2~2|13370820|13370094|++	miR838	AT2G37360.1
2~2|13370820|13370094|++	miR838	AT5G46910.1
3~3|19095353|19094426|++	miR838	AT1G19180.2
3~3|19095353|19094426|++	miR838	AT1G79320.1
3~3|19095353|19094426|++	miR838	AT5G04180.1
3~3|19095353|19094426|++	miR838	AT5G54040.1
3~3|19095353|19094426|++	miR838	AT5G49600.1
3~3|19095353|19094426|++	miR838	AT5G45340.2
3~3|19095353|19094426|++	miR838	AT2G45720.1
3~3|19095353|19094426|++	miR838	AT5G65300.1
3~3|19095353|19094426|++	miR838	AT5G04250.2
3~3|19095353|19094426|++	miR838	AT2G37360.1
3~3|19095353|19094426|++	miR838	AT5G46910.1
1~1|7879089|7880684|--	miR838	AT1G19180.2
1~1|7879089|7880684|--	miR838	AT1G79320.1
1~1|7879089|7880684|--	miR838	AT5G04180.1
1~1|7879089|7880684|--	miR838	AT5G54040.1
1~1|7879089|7880684|--	miR838	AT5G49600.1
1~1|7879089|7880684|--	miR838	AT5G45340.2
1~1|7879089|7880684|--	miR838	AT2G45720.1
1~1|7879089|7880684|--	miR838	AT5G65300.1
1~1|7879089|7880684|--	miR838	AT5G04250.2
1~1|7879089|7880684|--	miR838	AT2G37360.1
1~1|7879089|7880684|--	miR838	AT5G46910.1
5~5|16185356|16185668|--	miR838	AT1G19180.2
5~5|16185356|16185668|--	miR838	AT1G79320.1
5~5|16185356|16185668|--	miR838	AT5G04180.1
5~5|16185356|16185668|--	miR838	AT5G54040.1
5~5|16185356|16185668|--	miR838	AT5G49600.1
5~5|16185356|16185668|--	miR838	AT5G45340.2
5~5|16185356|16185668|--	miR838	AT2G45720.1
5~5|16185356|16185668|--	miR838	AT5G65300.1
5~5|16185356|16185668|--	miR838	AT5G04250.2
5~5|16185356|16185668|--	miR838	AT2G37360.1
5~5|16185356|16185668|--	miR838	AT5G46910.1
1~1|26056117|26056712|--	miR838	AT1G19180.2
1~1|26056117|26056712|--	miR838	AT1G79320.1
1~1|26056117|26056712|--	miR838	AT5G04180.1
1~1|26056117|26056712|--	miR838	AT5G54040.1
1~1|26056117|26056712|--	miR838	AT5G49600.1
1~1|26056117|26056712|--	miR838	AT5G45340.2
1~1|26056117|26056712|--	miR838	AT2G45720.1
1~1|26056117|26056712|--	miR838	AT5G65300.1
1~1|26056117|26056712|--	miR838	AT5G04250.2
1~1|26056117|26056712|--	miR838	AT2G37360.1
1~1|26056117|26056712|--	miR838	AT5G46910.1
4~4|9207163|9211511|--	miR838	AT1G19180.2
4~4|9207163|9211511|--	miR838	AT1G79320.1
4~4|9207163|9211511|--	miR838	AT5G04180.1
4~4|9207163|9211511|--	miR838	AT5G54040.1
4~4|9207163|9211511|--	miR838	AT5G49600.1
4~4|9207163|9211511|--	miR838	AT5G45340.2
4~4|9207163|9211511|--	miR838	AT2G45720.1
4~4|9207163|9211511|--	miR838	AT5G65300.1
4~4|9207163|9211511|--	miR838	AT5G04250.2
4~4|9207163|9211511|--	miR838	AT2G37360.1
4~4|9207163|9211511|--	miR838	AT5G46910.1
4~4|13669527|13670730|--	miR838	AT1G19180.2
4~4|13669527|13670730|--	miR838	AT1G79320.1
4~4|13669527|13670730|--	miR838	AT5G04180.1
4~4|13669527|13670730|--	miR838	AT5G54040.1
4~4|13669527|13670730|--	miR838	AT5G49600.1
4~4|13669527|13670730|--	miR838	AT5G45340.2
4~4|13669527|13670730|--	miR838	AT2G45720.1
4~4|13669527|13670730|--	miR838	AT5G65300.1
4~4|13669527|13670730|--	miR838	AT5G04250.2
4~4|13669527|13670730|--	miR838	AT2G37360.1
4~4|13669527|13670730|--	miR838	AT5G46910.1
5~5|23157629|23159628|--	miR838	AT1G19180.2
5~5|23157629|23159628|--	miR838	AT1G79320.1
5~5|23157629|23159628|--	miR838	AT5G04180.1
5~5|23157629|23159628|--	miR838	AT5G54040.1
5~5|23157629|23159628|--	miR838	AT5G49600.1
5~5|23157629|23159628|--	miR838	AT5G45340.2
5~5|23157629|23159628|--	miR838	AT2G45720.1
5~5|23157629|23159628|--	miR838	AT5G65300.1
5~5|23157629|23159628|--	miR838	AT5G04250.2
5~5|23157629|23159628|--	miR838	AT2G37360.1
5~5|23157629|23159628|--	miR838	AT5G46910.1
1~1|9407668|9408594|--	miR838	AT1G19180.2
1~1|9407668|9408594|--	miR838	AT1G79320.1
1~1|9407668|9408594|--	miR838	AT5G04180.1
1~1|9407668|9408594|--	miR838	AT5G54040.1
1~1|9407668|9408594|--	miR838	AT5G49600.1
1~1|9407668|9408594|--	miR838	AT5G45340.2
1~1|9407668|9408594|--	miR838	AT2G45720.1
1~1|9407668|9408594|--	miR838	AT5G65300.1
1~1|9407668|9408594|--	miR838	AT5G04250.2
1~1|9407668|9408594|--	miR838	AT2G37360.1
1~1|9407668|9408594|--	miR838	AT5G46910.1
5~5|22306027|22306885|--	miR838	AT1G19180.2
5~5|22306027|22306885|--	miR838	AT1G79320.1
5~5|22306027|22306885|--	miR838	AT5G04180.1
5~5|22306027|22306885|--	miR838	AT5G54040.1
5~5|22306027|22306885|--	miR838	AT5G49600.1
5~5|22306027|22306885|--	miR838	AT5G45340.2
5~5|22306027|22306885|--	miR838	AT2G45720.1
5~5|22306027|22306885|--	miR838	AT5G65300.1
5~5|22306027|22306885|--	miR838	AT5G04250.2
5~5|22306027|22306885|--	miR838	AT2G37360.1
5~5|22306027|22306885|--	miR838	AT5G46910.1
1~1|6891713|6893236|--	miR169a-5p	AT1G72830.1
1~1|6891713|6893236|--	miR169a-5p	AT1G70700.2
1~1|6891713|6893236|--	miR169a-5p	AT3G20910.1
1~1|6891713|6893236|--	miR169a-5p	AT1G54160.1
1~1|6891713|6893236|--	miR169a-5p	AT5G06510.1
1~1|6891713|6893236|--	miR169a-5p	AT3G05690.1
5~5|23157629|23159628|--	miR169a-5p	AT1G72830.1
5~5|23157629|23159628|--	miR169a-5p	AT1G70700.2
5~5|23157629|23159628|--	miR169a-5p	AT3G20910.1
5~5|23157629|23159628|--	miR169a-5p	AT1G54160.1
5~5|23157629|23159628|--	miR169a-5p	AT5G06510.1
5~5|23157629|23159628|--	miR169a-5p	AT3G05690.1
1~1|7879089|7880684|--	miR169a-5p	AT1G72830.1
1~1|7879089|7880684|--	miR169a-5p	AT1G70700.2
1~1|7879089|7880684|--	miR169a-5p	AT3G20910.1
1~1|7879089|7880684|--	miR169a-5p	AT1G54160.1
1~1|7879089|7880684|--	miR169a-5p	AT5G06510.1
1~1|7879089|7880684|--	miR169a-5p	AT3G05690.1
1~1|7879089|7880684|--	miR156a-5p	AT4G27480.2
1~1|7879089|7880684|--	miR156a-5p	AT4G27480.1
1~1|7879089|7880684|--	miR156a-5p	AT4G35170.1
1~1|7879089|7880684|--	miR156a-5p	AT1G53160.1
1~1|7879089|7880684|--	miR156a-5p	AT3G28690.1
1~1|7879089|7880684|--	miR157a-5p	AT1G53160.1
3~3|17954439|17953266|++	miR319a	AT5G06100.1
5~5|23157629|23159628|--	miR172b-5p	AT5G48410.1
1~1|7879089|7880684|--	miR172b-5p	AT5G48410.1
1~1|6891713|6893236|--	miR169d	AT1G70700.2
1~1|6891713|6893236|--	miR169d	AT2G22560.1
1~1|6891713|6893236|--	miR169d	AT5G06510.1
1~1|6891713|6893236|--	miR169d	AT3G05690.1
1~1|6891713|6893236|--	miR169d	AT1G54160.1
1~1|6891713|6893236|--	miR169d	AT1G72830.1
1~1|6891713|6893236|--	miR169d	AT3G20910.1
1~1|7879089|7880684|--	miR169d	AT1G70700.2
1~1|7879089|7880684|--	miR169d	AT2G22560.1
1~1|7879089|7880684|--	miR169d	AT5G06510.1
1~1|7879089|7880684|--	miR169d	AT3G05690.1
1~1|7879089|7880684|--	miR169d	AT1G54160.1
1~1|7879089|7880684|--	miR169d	AT1G72830.1
1~1|7879089|7880684|--	miR169d	AT3G20910.1
5~5|17621714|17620798|++	miR447a.2-3p	AT1G54710.1
